# Supplementary material for: Evaluation of the effect of nickel clusters on the formation of incipient soot particles from polycyclic aromatic hydrocarbons via ReaxFF molecular dynamics simulations
Source: Royal Society of Chemistry journal article supplement (doi:10.1039/c9cp00354a), 2019-01-01
Supplement: c9cp00354a1.pdf [file c9cp00354a1.pdf]

## Supplementary Material

### Evaluation of the Effect of Nickel Clusters on the Formation of Incipient Soot Particles from Polycyclic Aromatic Hydrocarbons through ReaxFF Molecular Dynamics Simulations

Sharmin Shabnam<sup>1</sup>, Qian Mao<sup>2</sup>, Adri C.T. van Duin<sup>1\*</sup>, K. H. Luo<sup>2,3</sup>

<sup>1</sup>Department of Mechanical and Nuclear Engineering, The Pennsylvania State University, University Park, PA 16802, USA

<sup>2</sup>Center for Combustion Energy, Key Laboratory for Thermal Science and Power Engineering of Ministry of Education, Department of Thermal Engineering, Tsinghua University, Beijing 100084, China

<sup>3</sup>Department of Mechanical Engineering, University College London, Torrington Place, London WC1E 7JE, UK

\*Corresponding author: Email: [acv13@psu.edu](mailto:acv13@psu.edu) (Adri van Duin)

#### 1. Additional figures

The mechanism of PAH binding through physical and chemical nucleation has been observed to be similar for the different types of PAHs studied in this work. Each case is repeated three times with three different initial trajectories. The trends observed in different trajectories lead to similar conclusions, the difference being the initiation time and the size of the cluster. Some additional figures have been included here for further clarification.

##### 1.1 Physical Nucleation

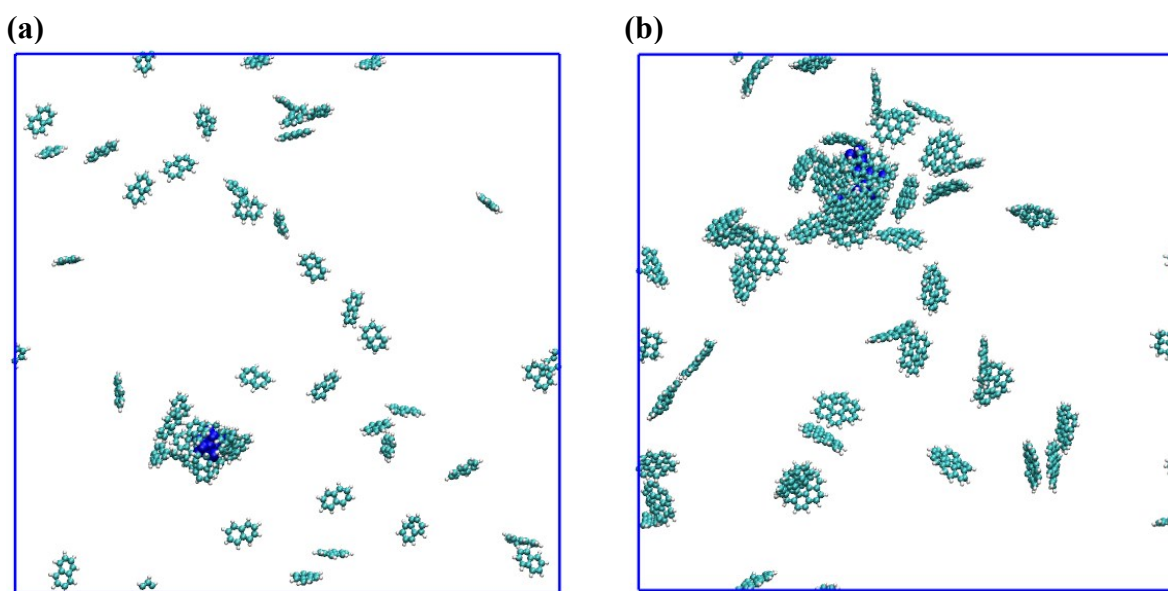

**Figure S1:** Snapshots demonstrating physical nucleation of soot particles obtained at the end (2000 ps) of ReaxFF-MD simulations for systems containing 50 (a) naphthalene molecules and Ni<sub>13</sub> cluster

at 800 K, and (b) coronene molecules and Ni<sub>13</sub> cluster at 1200 K. Cyan, white and blue spheres represent carbon, hydrogen and nickel atoms, respectively.

## 1.2 Chemical Nucleation

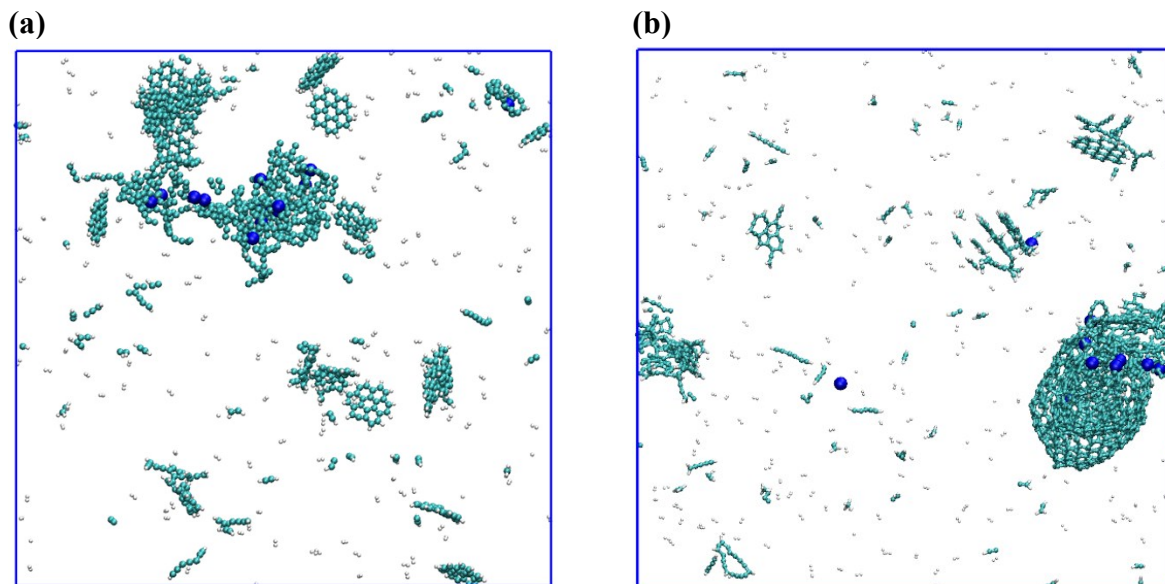

**Figure S2:** Snapshots demonstrating chemical nucleation of soot particles obtained at the end (2000ps) of ReaxFF-MD simulations for systems containing 50 (a) coronene molecules and Ni<sub>13</sub> cluster at 2500 K, and (b) ovalene molecules and Ni<sub>13</sub> cluster at 2500 K. Cyan, white and blue spheres represent carbon, hydrogen and nickel atoms, respectively.

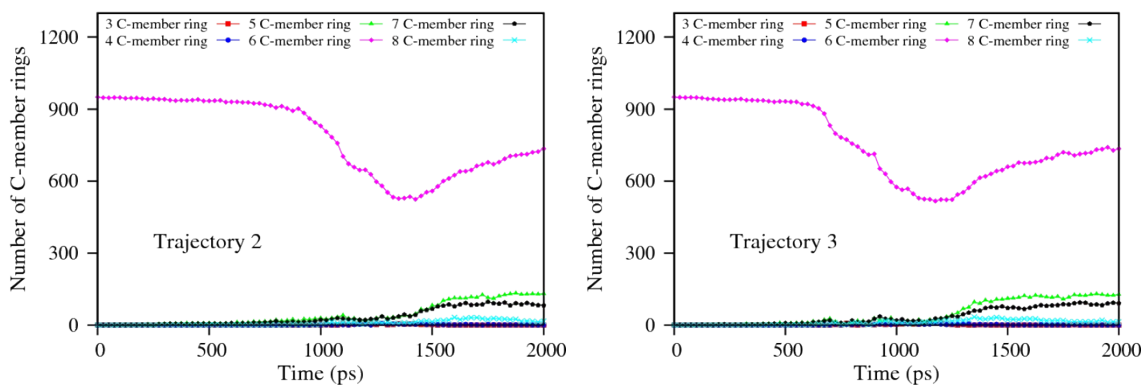

**Figure S6:** Ring count statistics during the soot nucleation from circumcoronene monomers as a function of simulation time at 2500 K for two additional simulations with different initial trajectories.

## 2. Mueller et al. Ni/C/H/O force field parameters

Reactive MD-force field: Jan28 2014 Ni/C/H/O/vacancy + Ni/CO<sub>x</sub>

```

39          ! Number of general parameters
50.0000 !Overcoordination parameter
 9.5469 !Overcoordination parameter
26.5405 !Valency angle conjugation parameter
 1.7224 !Triple bond stabilisation parameter
 6.8702 !Triple bond stabilisation parameter
70.0000 !C2-correction
 1.0588 !Undercoordination parameter
 4.6000 !Triple bond stabilisation parameter
12.1176 !Undercoordination parameter
13.3056 !Undercoordination parameter
-70.5044 !Triple bond stabilization energy
 0.0000 !Lower Taper-radius
10.0000 !Upper Taper-radius
 2.8793 !Not used
33.8667 !Valency undercoordination
 6.0891 !Valency angle/lone pair parameter
 1.0563 !Valency angle
 2.0384 !Valency angle parameter
 6.1431 !Not used
 6.9290 !Double bond/angle parameter
 0.3989 !Double bond/angle parameter: overcoord
 3.9954 !Double bond/angle parameter: overcoord
-2.4837 !Not used
 5.7796 !Torsion/BO parameter
10.0000 !Torsion overcoordination
 1.9487 !Torsion overcoordination
-1.2327 !Conjugation 0 (not used)
 2.1645 !Conjugation
 1.5591 !vdWaals shielding
 0.1000 !Cutoff for bond order (*100)
 2.1365 !Valency angle conjugation parameter
 0.6991 !Overcoordination parameter
50.0000 !Overcoordination parameter
 1.8512 !Valency/lone pair parameter
 0.5000 !Not used
20.0000 !Not used
 5.0000 !Molecular energy (not used)
 0.0000 !Molecular energy (not used)
 2.6962 !Valency angle conjugation parameter
10      ! Nr of atoms; cov.r; valency;a.m;Rvdw;Evdw;gammaEEM;cov.r2;#
        alfa;gammavdW;valency;Eunder;Eover;chiEEM;etaEEM;n.u.
        cov r3;Elp;Heat inc.;n.u.;n.u.;n.u.;n.u.
        ov/un;vall;n.u.;val3,vval4
C      1.3674   4.0000  12.0000   2.0453   0.1444   0.8485   1.1706
4.0000
      9.0000   1.5000   4.0000  30.0000  79.5548   4.8446   7.0000
0.0000
      1.1168   0.0000 181.0000  14.2732  24.4406   6.7313   0.8563
0.0000
      -4.1021   5.0000   1.0564   4.0000   2.9663   0.0000   0.0000
0.0000

```

|        |          |          |          |          |          |         |         |
|--------|----------|----------|----------|----------|----------|---------|---------|
| H      | 0.8930   | 1.0000   | 1.0080   | 1.3550   | 0.0930   | 0.8203  | -0.1000 |
| 1.0000 |          |          |          |          |          |         |         |
|        | 8.2230   | 33.2894  | 1.0000   | 0.0000   | 121.1250 | 3.7248  | 9.6093  |
| 1.0000 |          |          |          |          |          |         |         |
|        | -0.1000  | 0.0000   | 61.6606  | 3.0408   | 2.4197   | 0.0003  | 1.0698  |
| 0.0000 |          |          |          |          |          |         |         |
|        | -19.4571 | 4.2733   | 1.0338   | 1.0000   | 2.8793   | 0.0000  | 0.0000  |
| 0.0000 |          |          |          |          |          |         |         |
| O      | 1.2450   | 2.0000   | 15.9990  | 2.3890   | 0.1000   | 1.0898  | 1.0548  |
| 6.0000 |          |          |          |          |          |         |         |
|        | 9.7300   | 13.8449  | 4.0000   | 37.5000  | 116.0768 | 8.5000  | 8.3122  |
| 2.0000 |          |          |          |          |          |         |         |
|        | 0.9049   | 0.4056   | 59.0626  | 3.5027   | 0.7640   | 0.0021  | 0.9745  |
| 0.0000 |          |          |          |          |          |         |         |
|        | -3.5500  | 2.9000   | 1.0493   | 4.0000   | 2.9225   | 0.0000  | 0.0000  |
| 0.0000 |          |          |          |          |          |         |         |
| Fe     | 1.9029   | 3.0000   | 55.8450  | 2.0990   | 0.1181   | 0.4744  | -1.6836 |
| 3.0000 |          |          |          |          |          |         |         |
|        | 10.8548  | 2.6084   | 3.0000   | 0.0000   | 18.3725  | 1.7785  | 8.6281  |
| 0.0000 |          |          |          |          |          |         |         |
|        | -1.2000  | 0.0000   | 102.1000 | 25.3430  | 10.1260  | 0.7590  | 0.8563  |
| 0.0000 |          |          |          |          |          |         |         |
|        | -16.0573 | 2.6997   | 1.0338   | 6.0000   | 2.5791   | 0.0000  | 0.0000  |
| 0.0000 |          |          |          |          |          |         |         |
| Al     | 2.4443   | 3.0000   | 26.9820  | 2.0089   | 0.2161   | 0.5675  | -1.6836 |
| 3.0000 |          |          |          |          |          |         |         |
|        | 11.8538  | 16.3962  | 3.0000   | 0.0076   | 16.5151  | -0.2451 | 6.3319  |
| 0.0000 |          |          |          |          |          |         |         |
|        | -1.0000  | 0.0000   | 67.5458  | 137.9671 | 0.2042   | 0.0000  | 0.8563  |
| 0.0000 |          |          |          |          |          |         |         |
|        | -14.9162 | 3.0000   | 1.0338   | 3.0000   | 2.5791   | 0.0000  | 0.0000  |
| 0.0000 |          |          |          |          |          |         |         |
| Ni     | 1.8244   | 2.0000   | 58.6900  | 1.8442   | 0.1840   | 0.8105  | 0.1000  |
| 2.0000 |          |          |          |          |          |         |         |
|        | 12.3227  | 3.8387   | 2.0000   | 0.0000   | 0.0000   | 0.0100  | 6.1195  |
| 0.0000 |          |          |          |          |          |         |         |
|        | -1.0000  | 0.0000   | 103.2000 | 50.6786  | 0.6762   | 0.0981  | 0.8563  |
| 0.0000 |          |          |          |          |          |         |         |
|        | -19.6282 | 3.6035   | 1.0338   | 8.0000   | 2.5791   | 0.0000  | 0.0000  |
| 0.0000 |          |          |          |          |          |         |         |
| Cu     | 1.9202   | 2.0000   | 63.5460  | 1.9221   | 0.2826   | 1.0000  | 0.1000  |
| 1.0000 |          |          |          |          |          |         |         |
|        | 10.9889  | 100.0000 | 1.0000   | 0.0000   | 0.0000   | 2.7875  | 6.0000  |
| 0.0000 |          |          |          |          |          |         |         |
|        | -1.0000  | 0.0000   | 80.7000  | 34.9555  | 0.4988   | 0.0000  | 0.8563  |
| 0.0000 |          |          |          |          |          |         |         |
|        | -5.1872  | 3.1491   | 1.0000   | 4.0000   | 2.5791   | 0.0000  | 0.0000  |
| 0.0000 |          |          |          |          |          |         |         |
| S      | 1.8328   | 2.0000   | 32.0600  | 1.8815   | 0.3236   | 0.7530  | 1.6468  |
| 6.0000 |          |          |          |          |          |         |         |
|        | 9.0000   | 4.9055   | 4.0000   | 30.0000  | 112.1416 | 6.5745  | 9.0000  |
| 2.0000 |          |          |          |          |          |         |         |

|        |                                                                                               |          |          |         |         |         |           |         |
|--------|-----------------------------------------------------------------------------------------------|----------|----------|---------|---------|---------|-----------|---------|
| 0.0000 | 1.0000                                                                                        | 3.4994   | 65.0000  | 12.0000 | 22.1978 | 15.3230 | 0.9745    |         |
| 0.0000 | -15.7363                                                                                      | 2.8802   | 1.0338   | 6.2998  | 2.8793  | 0.0000  | 0.0000    |         |
| 6.0000 | Cr 1.8834                                                                                     | 3.0000   | 51.9962  | 2.3133  | 0.2205  | 0.4744  | -1.6836   |         |
| 0.0000 | 10.2460                                                                                       | 3.2000   | 3.0000   | 0.0000  | 18.3190 | 1.4000  | 9.0000    |         |
| 0.0000 | -1.2000                                                                                       | 0.0000   | 102.1000 | 25.3430 | 10.1260 | 0.7590  | 0.8563    |         |
| 0.0000 | -4.1000                                                                                       | 2.6997   | 1.0338   | 6.0000  | 2.5791  | 0.0000  | 0.0000    |         |
| 6.0000 | X -0.1000                                                                                     | 2.0000   | 1.0080   | 2.0000  | 0.0000  | 0.0100  | -0.1000   |         |
| 0.0000 | 10.0000                                                                                       | 2.5000   | 4.0000   | 0.0000  | 0.0000  | 5.0000  | 9999.9999 |         |
| 0.0000 | -0.1000                                                                                       | 0.0000   | -2.3700  | 8.7410  | 13.3640 | 0.6690  | 0.9745    |         |
| 0.0000 | -11.0000                                                                                      | 2.7466   | 1.0338   | 2.0000  | 2.8793  | 0.0000  | 0.0000    |         |
| 35     | ! Nr of bonds; Edisl;LPpen;n.u.;pbe1;pbo5;13corr;pbo6<br>pbe2;pbo3;pbo4;n.u.;pbo1;pbo2;ovcorr |          |          |         |         |         |           |         |
| 0.7769 | 1 1                                                                                           | 80.8865  | 107.9944 | 52.0636 | 0.5218  | -0.3636 | 1.0000    | 34.9876 |
| 0.0000 |                                                                                               | 6.1244   | -0.1693  | 8.0804  | 1.0000  | -0.0586 | 8.1850    | 1.0000  |
| 0.6281 | 1 2                                                                                           | 180.6309 | 0.0000   | 0.0000  | -0.4794 | 0.0000  | 1.0000    | 6.0000  |
| 0.0000 |                                                                                               | 12.2202  | 1.0000   | 0.0000  | 1.0000  | -0.0670 | 6.8158    | 0.0000  |
| 0.7300 | 2 2                                                                                           | 153.3934 | 0.0000   | 0.0000  | -0.4600 | 0.0000  | 1.0000    | 6.0000  |
| 0.0000 |                                                                                               | 6.2500   | 1.0000   | 0.0000  | 1.0000  | -0.0790 | 6.0552    | 0.0000  |
| 1.0000 | 1 3                                                                                           | 163.3110 | 83.9973  | 54.4316 | -0.5220 | -0.3123 | 1.0000    | 10.2503 |
| 0.0000 |                                                                                               | 0.3553   | -0.3757  | 7.0000  | 1.0000  | -0.1331 | 4.6021    | 0.0000  |
| 0.5626 | 2 3                                                                                           | 160.0000 | 0.0000   | 0.0000  | -0.5725 | 0.0000  | 1.0000    | 6.0000  |
| 0.0000 |                                                                                               | 1.1150   | 1.0000   | 0.0000  | 0.0000  | -0.0920 | 4.2790    | 0.0000  |
| 0.6051 | 3 3                                                                                           | 142.2858 | 145.0000 | 50.8293 | 0.2506  | -0.1000 | 1.0000    | 29.7503 |
| 0.0000 |                                                                                               | 0.3451   | -0.1055  | 9.0000  | 1.0000  | -0.1225 | 5.5000    | 1.0000  |
| 0.5000 | 1 4                                                                                           | 0.0000   | 0.0000   | 0.0000  | 1.0000  | -0.3000 | 1.0000    | 36.0000 |
| 0.0000 |                                                                                               | 0.2350   | -0.3500  | 15.0000 | 1.0000  | -0.2000 | 8.0000    | 1.0000  |
| 0.5000 | 2 4                                                                                           | 0.0000   | 0.0000   | 0.0000  | 1.0000  | -0.3000 | 1.0000    | 36.0000 |

|        |     |          |         |         |         |         |        |         |
|--------|-----|----------|---------|---------|---------|---------|--------|---------|
| 0.0000 |     | 0.2350   | -0.3500 | 15.0000 | 1.0000  | -0.2000 | 8.0000 | 1.0000  |
| 0.0852 | 3 4 | 67.5128  | 0.0000  | 0.0000  | 0.1301  | -0.3000 | 0.0000 | 36.0000 |
| 0.0000 |     | 1.0000   | -0.3500 | 15.0000 | 1.0000  | -0.0629 | 7.1208 | 0.0000  |
| 0.2682 | 4 4 | 41.4611  | 0.0000  | 0.0000  | 0.2931  | -0.2000 | 0.0000 | 16.0000 |
| 0.0000 |     | 0.6294   | -0.2000 | 15.0000 | 1.0000  | -0.0512 | 6.8013 | 0.0000  |
| 0.5000 | 1 5 | 0.0000   | 0.0000  | 0.0000  | 1.0000  | -0.3000 | 1.0000 | 36.0000 |
| 0.0000 |     | 0.2350   | -0.3500 | 15.0000 | 1.0000  | -0.2000 | 8.0000 | 1.0000  |
| 0.5000 | 2 5 | 0.0000   | 0.0000  | 0.0000  | 1.0000  | -0.3000 | 1.0000 | 36.0000 |
| 0.0000 |     | 0.2350   | -0.3500 | 15.0000 | 1.0000  | -0.2000 | 8.0000 | 1.0000  |
| 0.0100 | 3 5 | 175.2517 | 0.0000  | 0.0000  | -0.8707 | -0.3000 | 0.0000 | 36.0000 |
| 0.0000 |     | 0.9278   | -0.3500 | 25.0000 | 1.0000  | -0.1183 | 4.6533 | 0.0000  |
| 0.2822 | 4 5 | 64.0323  | 0.0000  | 0.0000  | -0.2720 | -0.3000 | 0.0000 | 16.0000 |
| 0.0000 |     | 2.2322   | -0.4197 | 14.3085 | 1.0000  | -0.2524 | 7.2814 | 0.0000  |
| 0.2955 | 5 5 | 65.7742  | 0.0000  | 0.0000  | -0.4111 | -0.3000 | 0.0000 | 16.0000 |
| 0.0000 |     | 2.8637   | -0.4197 | 14.3085 | 1.0000  | -0.1993 | 4.8757 | 0.0000  |
| 0.0100 | 1 6 | 72.3357  | 14.1215 | 0.0000  | 0.2743  | -0.2000 | 1.0000 | 16.0000 |
| 0.0000 |     | 3.0781   | -0.0871 | 13.4739 | 1.0000  | -0.1539 | 4.5484 | 1.0000  |
| 0.1422 | 2 6 | 101.5086 | 0.0000  | 0.0000  | -0.4746 | 0.0000  | 1.0000 | 6.0000  |
| 0.0000 |     | 0.1863   | 1.0000  | 0.0000  | 1.0000  | -0.0963 | 5.5382 | 0.0000  |
| 0.0715 | 3 6 | 86.9034  | 0.0000  | 0.0000  | 0.3377  | -0.2000 | 1.0000 | 16.0000 |
| 0.0000 |     | 2.5302   | -0.2500 | 15.0000 | 1.0000  | -0.1923 | 4.8493 | 1.0000  |
| 0.2063 | 4 6 | 77.1297  | 0.0000  | 0.0000  | -0.0431 | -0.2000 | 0.0000 | 16.0000 |
| 0.0000 |     | 4.3648   | -0.2000 | 15.0000 | 1.0000  | -0.2542 | 5.5181 | 0.0000  |
| 0.2283 | 5 6 | 62.3744  | 0.0000  | 0.0000  | -0.0066 | -0.2000 | 0.0000 | 16.0000 |
| 0.0000 |     | 10.9966  | -0.2000 | 15.0000 | 1.0000  | -0.1072 | 4.0000 | 0.0000  |
| 0.3225 | 6 6 | 90.1410  | 0.0000  | 0.0000  | -0.3857 | -0.2000 | 0.0000 | 16.0000 |

|        |     |          |          |         |         |         |        |         |
|--------|-----|----------|----------|---------|---------|---------|--------|---------|
| 0.0000 |     | 1.0927   | -0.2000  | 15.0000 | 1.0000  | -0.1027 | 4.6972 | 0.0000  |
| 0.5000 | 2 7 | 0.0000   | 0.0000   | 0.0000  | 0.2000  | -0.1418 | 1.0000 | 13.1260 |
| 0.0000 |     | 0.5000   | -0.2000  | 20.0000 | 1.0000  | -0.1000 | 9.0000 | 0.0000  |
| 0.0025 | 3 7 | 81.4346  | 0.0000   | 0.0000  | -0.1594 | -0.3000 | 1.0000 | 36.0000 |
| 0.0000 |     | 0.2904   | -0.2500  | 12.0000 | 1.0000  | -0.0742 | 9.3638 | 0.0000  |
| 0.3414 | 7 7 | 73.6263  | 0.0000   | 0.0000  | 0.0209  | -0.2000 | 0.0000 | 16.0000 |
| 0.0000 |     | 0.4703   | -0.2000  | 15.0000 | 1.0000  | -0.1319 | 5.9254 | 0.0000  |
| 0.1958 | 1 8 | 192.1462 | 90.5383  | 55.2528 | -0.5652 | -0.5211 | 1.0000 | 18.9617 |
| 0.0000 |     | 2.0000   | -0.1016  | 13.8750 | 1.0000  | -0.1579 | 5.5813 | 1.0000  |
| 0.3870 | 2 8 | 188.3744 | 0.0000   | 0.0000  | -0.6562 | 0.0000  | 1.0000 | 6.0000  |
| 0.0000 |     | 11.8360  | 1.0000   | 0.0000  | 1.0000  | -0.0762 | 5.0961 | 1.0000  |
| 0.0500 | 3 8 | 107.2917 | 202.9813 | 40.0000 | 0.4728  | -0.2406 | 1.0000 | 22.1005 |
| 0.0000 |     | 0.6528   | -0.3341  | 7.9877  | 1.0000  | -0.0909 | 6.9512 | 1.0000  |
| 0.1769 | 4 8 | 75.5280  | 0.0000   | 0.0000  | -0.4815 | -0.3390 | 0.0000 | 16.0000 |
| 0.0000 |     | 0.2800   | -0.1838  | 15.0000 | 1.0000  | -0.0758 | 6.3424 | 0.0000  |
| 0.1762 | 5 8 | 123.2631 | 0.0000   | 0.0000  | -0.4814 | -0.3000 | 0.0000 | 16.0000 |
| 0.0000 |     | 4.6653   | -0.4197  | 14.3085 | 1.0000  | -0.1984 | 5.8018 | 0.0000  |
| 0.1000 | 6 8 | 90.8688  | 0.0000   | 0.0000  | 0.4233  | -0.2000 | 0.0000 | 16.0000 |
| 0.0000 |     | 0.1604   | -0.2500  | 25.0000 | 1.0000  | -0.1028 | 5.0666 | 0.0000  |
| 0.0999 | 8 8 | 86.8868  | 69.1367  | 0.0000  | -0.9993 | -0.4781 | 1.0000 | 17.8574 |
| 0.0000 |     | 0.2799   | -0.1677  | 8.2557  | 1.0000  | -0.1131 | 6.1440 | 1.0000  |
| 0.5000 | 2 9 | 0.0000   | 0.0000   | 0.0000  | 1.0000  | -0.3000 | 1.0000 | 36.0000 |
| 0.0000 |     | 0.3000   | -0.3500  | 15.0000 | 1.0000  | -0.2000 | 8.0000 | 1.0000  |
| 0.0100 | 3 9 | 103.1988 | 13.4351  | 0.0000  | 0.3247  | -0.2172 | 1.0000 | 36.0000 |
| 0.0000 |     | 1.9519   | -0.2293  | 9.6056  | 1.0000  | -0.2000 | 5.7127 | 1.0000  |
| 0.0100 | 8 9 | 103.3203 | 0.0000   | 0.0000  | 0.6642  | -0.3891 | 1.0000 | 36.0000 |







|        |          |          |         |        |        |        |
|--------|----------|----------|---------|--------|--------|--------|
| 8 5 8  | 92.5166  | 8.8772   | 2.9319  | 0.0000 | 0.2516 | 0.0000 |
| 1.0620 |          |          |         |        |        |        |
| 5 8 5  | 73.8915  | 23.2173  | 2.0851  | 0.0000 | 0.0100 | 0.0000 |
| 2.6540 |          |          |         |        |        |        |
| 5 5 8  | 69.3869  | 3.0494   | 3.0000  | 0.0000 | 0.6079 | 0.0000 |
| 1.0000 |          |          |         |        |        |        |
| 5 8 8  | 30.9172  | 16.7973  | 1.5917  | 0.0000 | 0.9584 | 0.0000 |
| 2.1273 |          |          |         |        |        |        |
| 2 8 5  | 83.4937  | 25.0000  | 1.0000  | 0.5000 | 0.5409 | 0.0000 |
| 1.1378 |          |          |         |        |        |        |
| 5 2 8  | 0.0000   | 10.0000  | 1.0000  | 0.5000 | 0.2500 | 0.0000 |
| 1.5000 |          |          |         |        |        |        |
| 8 8 8  | 84.2345  | 15.5790  | 3.7715  | 0.0000 | 1.3066 | 0.0000 |
| 1.6270 |          |          |         |        |        |        |
| 1 6 1  | 86.9687  | 17.4560  | 0.6761  | 0.0000 | 1.3985 | 0.0000 |
| 1.0000 |          |          |         |        |        |        |
| 1 1 6  | 81.6643  | 16.7896  | 0.9911  | 0.0000 | 0.0100 | 0.0000 |
| 1.2853 |          |          |         |        |        |        |
| 6 1 6  | 91.9774  | 25.3393  | 3.6465  | 0.0000 | 0.0100 | 0.0000 |
| 3.0000 |          |          |         |        |        |        |
| 1 6 6  | 28.2735  | 4.0839   | 0.8183  | 0.0000 | 0.8382 | 0.0000 |
| 1.8508 |          |          |         |        |        |        |
| 2 6 2  | 85.1733  | 30.0000  | 1.5231  | 0.0000 | 3.0000 | 0.0000 |
| 3.2533 |          |          |         |        |        |        |
| 2 2 6  | 0.0000   | 8.0096   | 0.3378  | 0.0000 | 0.6843 | 0.0000 |
| 4.0000 |          |          |         |        |        |        |
| 6 2 6  | 0.0000   | 29.9951  | 5.6363  | 0.0000 | 1.2512 | 0.0000 |
| 2.0120 |          |          |         |        |        |        |
| 2 6 6  | 42.3753  | 1.9810   | 6.2947  | 0.0000 | 0.5297 | 0.0000 |
| 4.0000 |          |          |         |        |        |        |
| 2 6 6  | 180.0000 | -30.0000 | 12.8298 | 0.0000 | 1.3351 | 0.0000 |
| 1.1937 |          |          |         |        |        |        |
| 3 3 6  | 90.0000  | 37.7567  | 4.4033  | 0.0000 | 1.1448 | 0.0000 |
| 1.0000 |          |          |         |        |        |        |
| 6 3 6  | 88.1216  | 15.8581  | 2.7094  | 0.0000 | 0.6326 | 0.0000 |
| 1.1340 |          |          |         |        |        |        |
| 3 6 3  | 33.8130  | 15.1818  | 4.0000  | 0.0000 | 0.0354 | 0.0000 |
| 1.3198 |          |          |         |        |        |        |
| 3 6 6  | 19.7429  | 2.9501   | 3.6277  | 0.0000 | 0.0732 | 0.0000 |
| 1.7069 |          |          |         |        |        |        |
| 2 1 6  | 90.0000  | 37.8850  | 0.4107  | 0.0000 | 2.7596 | 0.0000 |
| 1.0000 |          |          |         |        |        |        |
| 1 2 6  | 0.0000   | 0.1000   | 0.9742  | 0.0000 | 0.8492 | 0.0000 |
| 3.8603 |          |          |         |        |        |        |
| 1 6 2  | 100.0000 | 45.0000  | 0.7043  | 0.0000 | 0.6704 | 0.0000 |
| 1.0000 |          |          |         |        |        |        |
| 1 3 6  | 63.5380  | 29.3917  | 1.6142  | 0.0000 | 1.6844 | 0.0000 |
| 1.0470 |          |          |         |        |        |        |
| 3 1 6  | 58.5735  | 27.3130  | 1.4647  | 0.0000 | 1.2802 | 0.0000 |
| 1.0000 |          |          |         |        |        |        |
| 1 6 3  | 60.0910  | 28.8774  | 1.8703  | 0.0000 | 1.0116 | 0.0000 |
| 1.0796 |          |          |         |        |        |        |

|        |          |         |        |         |        |        |
|--------|----------|---------|--------|---------|--------|--------|
| 2 3 6  | 30.2285  | 16.5089 | 2.5143 | 0.5000  | 1.0129 | 0.0000 |
| 1.5363 |          |         |        |         |        |        |
| 3 2 6  | 0.0000   | 7.1233  | 1.9895 | 0.5000  | 0.3233 | 0.0000 |
| 1.1000 |          |         |        |         |        |        |
| 8 6 8  | 0.2000   | 6.6443  | 1.2359 | 0.0000  | 0.0156 | 0.0000 |
| 1.1250 |          |         |        |         |        |        |
| 6 8 6  | 107.2989 | 23.4838 | 0.7435 | 0.0000  | 0.2609 | 0.0000 |
| 1.3395 |          |         |        |         |        |        |
| 6 6 8  | 18.7110  | 13.5233 | 0.1006 | 0.0000  | 0.0747 | 0.0000 |
| 1.3658 |          |         |        |         |        |        |
| 6 8 8  | 54.9369  | 16.5560 | 6.0000 | 0.0000  | 0.2213 | 0.0000 |
| 1.5255 |          |         |        |         |        |        |
| 2 8 6  | 83.4937  | 16.7605 | 0.8242 | 0.5000  | 0.5409 | 0.0000 |
| 1.1378 |          |         |        |         |        |        |
| 6 2 8  | 0.0000   | 10.0000 | 1.0000 | 0.5000  | 0.2500 | 0.0000 |
| 1.5000 |          |         |        |         |        |        |
| 2 8 2  | 90.0601  | 42.2756 | 0.5302 | 0.0000  | 0.3707 | 0.0000 |
| 1.0071 |          |         |        |         |        |        |
| 2 8 8  | 66.1035  | 8.0885  | 1.0424 | 0.0000  | 0.7355 | 0.0000 |
| 3.0000 |          |         |        |         |        |        |
| 3 5 8  | 19.4072  | 10.4590 | 2.8285 | 0.0000  | 1.0074 | 0.0000 |
| 2.3949 |          |         |        |         |        |        |
| 3 8 5  | 83.6415  | 19.7500 | 2.9247 | 0.0000  | 1.9437 | 0.0000 |
| 1.0348 |          |         |        |         |        |        |
| 5 3 8  | 89.6617  | 15.3276 | 2.7567 | 0.0000  | 1.6031 | 0.0000 |
| 1.0781 |          |         |        |         |        |        |
| 5 3 6  | 95.3249  | 30.0000 | 0.6664 | 0.0000  | 2.0000 | 0.0000 |
| 1.0000 |          |         |        |         |        |        |
| 3 5 6  | 4.7439   | 7.2911  | 1.8650 | 0.0000  | 1.5814 | 0.0000 |
| 1.4132 |          |         |        |         |        |        |
| 3 6 5  | 39.4301  | 10.2218 | 1.3968 | 0.0000  | 1.8777 | 0.0000 |
| 1.6288 |          |         |        |         |        |        |
| 1 1 8  | 71.4462  | 27.2223 | 6.7228 | 0.0000  | 0.0050 | 0.0000 |
| 2.6454 |          |         |        |         |        |        |
| 1 8 1  | 92.6710  | 15.6798 | 3.1104 | 0.0000  | 0.3458 | 0.0000 |
| 2.3207 |          |         |        |         |        |        |
| 2 1 8  | 43.6595  | 11.8933 | 0.5449 | 0.0000  | 0.0050 | 0.0000 |
| 1.9326 |          |         |        |         |        |        |
| 1 8 2  | 99.1897  | 14.1666 | 2.5588 | 0.0000  | 0.3542 | 0.0000 |
| 2.5990 |          |         |        |         |        |        |
| 1 8 8  | 89.3910  | 5.0000  | 7.0000 | 0.0000  | 1.0050 | 0.0000 |
| 1.5000 |          |         |        |         |        |        |
| 3 8 3  | 83.5231  | 37.5859 | 0.9881 | -0.0100 | 1.4725 | 0.0000 |
| 1.0641 |          |         |        |         |        |        |
| 1 8 3  | 79.9791  | 29.5117 | 7.0000 | 0.0000  | 0.0050 | 0.0000 |
| 1.2255 |          |         |        |         |        |        |
| 1 3 8  | 83.1032  | 23.4174 | 0.7741 | 0.0000  | 1.2168 | 0.0000 |
| 2.7365 |          |         |        |         |        |        |
| 3 3 8  | 60.2631  | 30.0701 | 2.1707 | 0.0000  | 1.3323 | 0.0000 |
| 1.0192 |          |         |        |         |        |        |
| 3 8 8  | 55.9402  | 38.2990 | 3.6930 | 0.0000  | 2.2673 | 0.0000 |
| 1.0000 |          |         |        |         |        |        |







|        |   |   |   |        |         |        |         |        |        |
|--------|---|---|---|--------|---------|--------|---------|--------|--------|
| 6      | 1 | 1 | 6 | 0.0000 | 23.4625 | 2.2056 | -4.0000 | 0.0000 | 0.0000 |
| 0.0000 |   |   |   |        |         |        |         |        |        |
| 2      | 1 | 1 | 6 | 0.0000 | 29.9163 | 0.6973 | -4.0000 | 0.0000 | 0.0000 |
| 0.0000 |   |   |   |        |         |        |         |        |        |
| 2      | 1 | 6 | 1 | 0.0000 | 0.0100  | 0.0100 | -6.0000 | 0.0000 | 0.0000 |
| 0.0000 |   |   |   |        |         |        |         |        |        |
| 1      | 1 | 6 | 1 | 0.0000 | 0.7817  | 0.0100 | -5.9539 | 0.0000 | 0.0000 |
| 0.0000 |   |   |   |        |         |        |         |        |        |
| 1      | 1 | 6 | 2 | 0.0000 | 6.0983  | 0.0100 | -5.9539 | 0.0000 | 0.0000 |
| 0.0000 |   |   |   |        |         |        |         |        |        |

4 ! Nr of hydrogen bonds;at1;at2;at3;Rhb;Dehb;vhb1

|   |   |   |        |         |        |         |
|---|---|---|--------|---------|--------|---------|
| 3 | 2 | 3 | 2.1200 | -3.5800 | 1.4500 | 19.5000 |
|---|---|---|--------|---------|--------|---------|

|   |   |   |        |         |        |         |
|---|---|---|--------|---------|--------|---------|
| 3 | 2 | 8 | 2.5000 | -1.0000 | 1.4500 | 19.5000 |
|---|---|---|--------|---------|--------|---------|

|   |   |   |        |         |        |         |
|---|---|---|--------|---------|--------|---------|
| 8 | 2 | 3 | 2.5000 | -1.0000 | 1.4500 | 19.5000 |
|---|---|---|--------|---------|--------|---------|

|   |   |   |        |         |        |         |
|---|---|---|--------|---------|--------|---------|
| 8 | 2 | 8 | 2.5000 | -2.0000 | 1.4500 | 19.5000 |
|---|---|---|--------|---------|--------|---------|
